# Supplementary material
Source: PubMed Central journal article supplement (PMC3528586)
Supplement: 1213322109_pnas.201213322SI.pdf [file 1213322109_pnas.201213322SI.pdf]

# Supporting Information

Brace et al. 10.1073/pnas.1213322109

## SI Text

**Archaeological Sites and Samples. Trou Al'Wesse (Belgium).** A total of 60 collared lemming mandibles were obtained from the current excavations on the terrace of Trou Al'Wesse (TAW; 50.421, 5.294). Located 50 m from the Hoyoux River in the Belgian Ardennes, this is a stratified prehistoric cave site with a long stratigraphic sequence containing Mousterian, Aurignacian, Mesolithic, and Neolithic occupations with intervening periods rich in faunal material (1, 2).

Samples were sourced from meter squares (e.g., M4) dug stratigraphically, each stratum dug in a series of 3- to 5-cm-thick spits. Each square is divided into 50-cm subsquares to control the context of sieved material; the coordinates of artifacts and bones larger than 1 cm are recorded using a Total Station. To examine faunal response to events surrounding the Last Glacial Maximum (LGM), and to remain within accepted limits for radiocarbon dating, collared lemming samples were obtained from pre-LGM strata (16 and 14) as well as post-LGM stratum 12, up to and including transition into the warmer climate of the Holocene (stratum 4b) (3).

**Marie-Jeanne (Belgium).** A total of 23 collared lemming mandibles were obtained from Caverne Marie-Jeanne (CMJ; 50.130, 4.476), an archeological cave site in the Belgian Ardennes, located 25 m above the right bank of the Féron, a small tributary of the Meuse River near Hastiere-Lavaux. M. Glibert of the Royal Belgian Institute of Natural Sciences initiated excavations of the cave in 1943 and found the deposits to be largely composed of clay, silt, and sand that had been washed into the cave along joints. Paleontological and archaeological objects recovered from the site suggest a Weichselian date, largely pre-Aurignacian in age. Artifacts attributable to the Mousterian were also discovered at the site, but too few to suggest a significant prehistoric human occupation (4). Collared lemming remains however, were found in all horizons, with samples used in this study originating from particularly abundant horizons: 2, 4, 5a, 5b, and 6 (5).

**Bridged Pot (United Kingdom).** A total of five collared lemming mandibles were obtained from Bridged Pot Cave (BPC; 51.234, -2.680), an archeological site located in Ebbor Gorge, Somerset, England. Excavation of the site was carried out by H. E. Balch, 1926–1929, and continued in 1958 by C. B. M. McBurney (6). Samples were sourced from an established stratigraphic layer (B), rich in small mammal remains and associated with the Younger Dryas ca. 12.8–11.5 Kyr BP (7).

Materials from each of the three locations were sieved on site, sealed in bags, and maintained at a constant temperature to limit contamination and DNA degradation. In the laboratory, mandibular samples were identified to species level through morphological characters of the M<sub>1</sub>, species specific to the collared lemming (8).

**DNA Extraction and Sequencing.** A total of 88 collared lemming mandibles were sourced for these analyses. DNA extractions were conducted in two dedicated ancient DNA laboratories: Royal Holloway, University of London (TAW and BPC samples) and the Swedish Museum of Natural History, Stockholm (CMJ samples). Samples were drilled or ground into a fine powder, with ~10–50 mg used in the DNA extraction process. DNA extraction protocol followed Yang et al. (9) using proteinase K to digest bone powders (modified with the inclusion of 1M urea in the extraction buffer) and silica spin columns to purify DNA. Mitochondrial DNA (mtDNA) was amplified using overlapping fragments spanning 780 base pairs of the cytochrome *b* (*cyt b*) region. Nine primer pairs were designed specifically for this study, each pair amplifying short (130–180 bp) overlapping fragments (Table S1). An additional forward primer (D2) was used for two samples (44a and 50a) following poor amplification results from an initial primer pair (D). PCR reactions (TAW and BPC samples) were performed using a final concentration of 1 × PCR buffer, 0.2 μM of each primer, 250 μM dNTPs, 2 mM MgSO<sub>4</sub>, 1 mg/mL BSA, 1 Unit Platinum Taq DNA polymerase high fidelity, purified water, and 2 μL of DNA extract in a 25 μL mix. PCR conditions were 5 min at 95 °C, followed by 55 cycles of 1 min at 92 °C, 1 min at 49 °C, 50 °C or 51 °C (dependent on primer pair specifications), 1 min at 68 °C, and with a final extension of 5 min at 68 °C. PCR reactions (CMJ samples) were performed using a final concentration of 1 × PCR buffer, 0.2 μM of each primer, 200 μM dNTPs, 2.5 mM MgCl<sub>2</sub>, 0.1 mg/mL BSA, 0.4 Units HotStar Taq DNA polymerase (Qiagen), purified water, and 2 μL of DNA extract in a 25 μL mix. PCR conditions were 10 min at 95 °C, followed by 55 cycles of 30 s at 94 °C, 30 s at 49 °C, 50 °C or 51 °C (dependent on primer pair specifications), 30 s at 72 °C, and with a final extension of 7 min at 72 °C.

Amplicons were purified using Exonuclease I and Shrimp Alkaline Phosphatase (TAW and BPC samples) and Exonuclease I and FastAP Thermosensitive Alkaline Phosphatase (CMJ samples). Sequencing reactions (TAW and BPC samples) were performed by Macrogen using a high-throughput genetic analysis sequencer (ABI3730XL) and at the Molecular Systematics laboratory at the Swedish Museum of Natural History (Stockholm, Sweden) using an ABI3130XL automated sequencer (CMJ samples). Sequencing chromatograms were assembled and analyzed using Sequencher 4.0 analysis software (Gene Codes Corporation) and Geneious 5.5.4 (10). Throughout our procedures, protocols to prevent contamination and ensure accurately coded (undamaged) mtDNA were followed: isolation of work areas, negative controls, reduced fragment length amplification, and repeated PCR amplification and sequencing of fragments.

1. Miller R, Stewart J, Zwyns JN, Otte M (2009) in *Chronology and Evolution within the Mesolithic of North-West Europe: Proceedings of an International Meeting, Brussels, May 30th–June 1st 2007*, eds Crombé P, Van Strydonck M, Sergeant J, Boudin M, Bats M (Cambridge Scholars Publishing, Newcastle upon Tyne, UK), pp. 287–306.
2. Miller R, Zwyns N, Otte M, Stevens C, Stewart J (2012) La séquence mésolithique et néolithique du Trou Al'Wesse (Belgique): Résultats pluridisciplinaires. *Anthropologie* 116:99–126.
3. Pirson S (1999) Étude sédimentologique préliminaire au Trou Al'Wesse (Modave, Belgique). *Bulletin de la Société royale belge d'études géologiques et archéologiques, (Les Chercheurs de la Wallonie)* 39:115–162.
4. Ballmann P, et al. (1980) in *La Caverne Marie-Jeanne (Hastiere-Lavaux, Belgique)*, eds Gautier A, de Heinzelin J (Institut Royal des Sciences Naturelles de Belgique, Belgium) *Memoire* 177:3–24.
5. Ballmann P, et al. (1980) in *La Caverne Marie-Jeanne (Hastiere-Lavaux, Belgique)*, eds Gautier A, de Heinzelin J (Institut Royal des Sciences Naturelles de Belgique, Belgium) *Memoire* 177:3–24.
6. Price CR (2003) Late Pleistocene and Early Holocene small mammals in South West Britain: Environmental and taphonomic implications and their role in archaeological research. (Archaeopress, Oxford, UK) *British Archaeological Reports British Series* 347.
7. Price CR (2003) Late Pleistocene and Early Holocene small mammals in South West Britain: Environmental and taphonomic implications and their role in archaeological research. *British Archaeological Reports* 347.
8. Nadachowski A (1982) *Late Quaternary Rodents of Poland with Special Reference to Morphotype Dentition Analysis of Voles* (Polska Akademia Nauk, Kraków).
9. Yang DY, Eng B, Wayne JS, Dudar JC, Saunders SR (1998) Technical note: Improved DNA extraction from ancient bones using silica-based spin columns. *Am J Phys Anthropol* 105(4):539–543.
10. Drummond AJ, et al. (2011) *Geneious v5.4* (Biomatters). Accessed January 10, 2012.

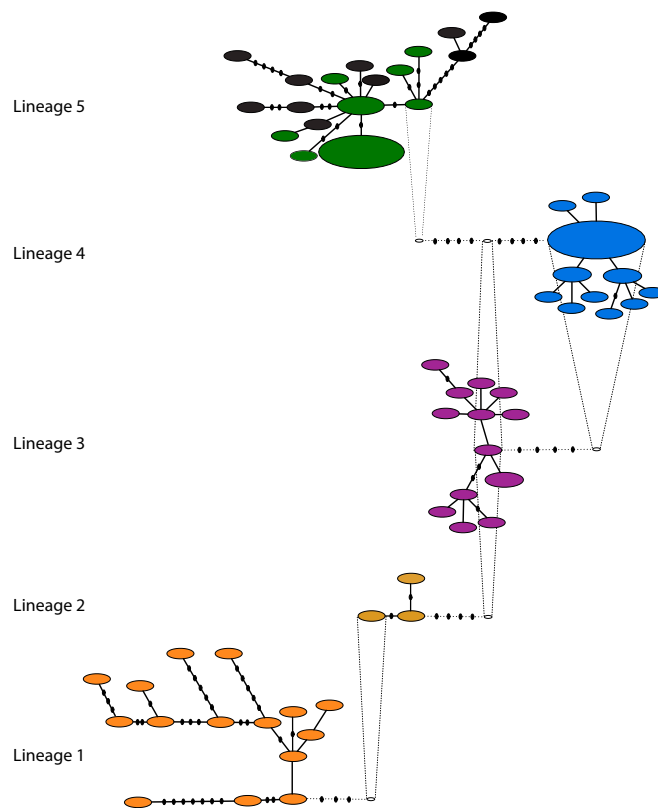

**Fig. S1.** Three-dimensional statistical parsimony network for *Dicrostonyx* mtDNA haplotypes (cyt *b*). Layers represent the different lineages identified by Bayesian phylogenetic analysis. Each circle represents one haplotype. Haplotype color corresponds to the most representative color from each lineage (Fig. 2), with modern haplotype circles M1–M10 colored black. Small black dots represent missing haplotypes. Small clear dots represent haplotypes that are missing from one particular layer but are present in the layer above or below. The size of each circle is proportional to haplotype frequency.

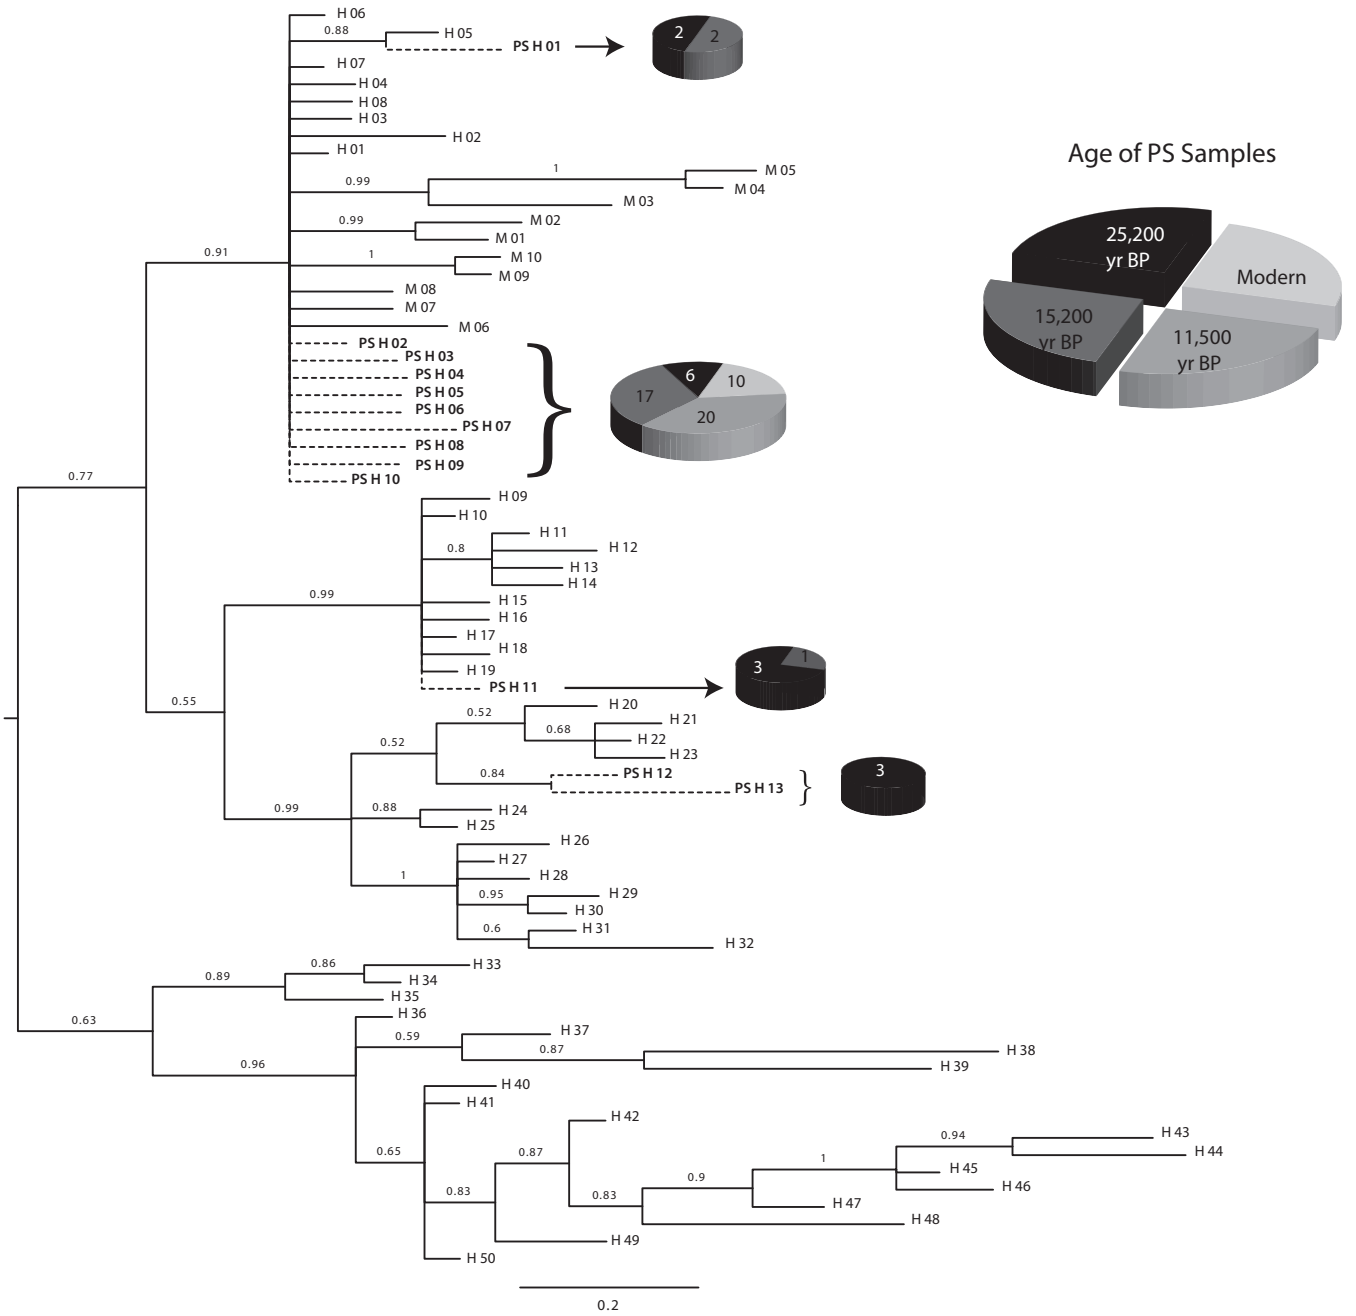

**Fig. S2.** Phylogeny for mtDNA haplotypes (cyt *b*) of *Dicrostonyx* combining our results and data from Pymva-Shor (1). Numbers above branches represent Bayesian posterior probabilities. The outgroup *Dicrostonyx hudsonius* is removed for display purposes. M, modern samples (GenBank); H, haplotype (ancient sample: present study); PS H and dashed branch line, haplotype from the Pymva-Shor study. Pie charts indicate details of the PS samples corresponding to each haplotype: segment color, sample ages in years Before Present; the number inside each segment represents number of samples per age group. Curly bracket indicates haplotypes that are combined into a single pie chart.

1. Prost S, et al. (2010) Influence of climate warming on arctic mammals? New insights from ancient DNA studies of the collared lemming *Dicrostonyx torquatus*. *PLoS ONE* 5(5):e10447.

**Table S1. Details of the primer pairs used to amplify mtDNA (cytochrome *b*) from samples of *Dicrostonyx***

| Primer name | Forward Sequence 5' to 3' | Reverse Sequence 5' to 3' | Annealing temp (°C) | Product        |              |             |
|-------------|---------------------------|---------------------------|---------------------|----------------|--------------|-------------|
|             |                           |                           |                     | Start position | End position | Length (bp) |
| A           | CATCTGATACAGCAACAGCATTCTC | GTAGATGCCTCGCTACGTGTAA    | 51                  | 167            | 286          | 143         |
| B           | TAATAGCAACAGCATTTCATAGG   | CCCCCTCAGATTCTTCTAC       | 50                  | 368            | 481          | 133         |
| C           | GGGGGCTTCTCAGTTGACAA      | GGATTTTGTCTGCGTCCGGAG     | 51                  | 496            | 636          | 160         |
| D           | CTCGGAGACCCAGATAATT       | GGAAGGTTATGAGGGCTAG       | 50                  | 748            | 901          | 172         |
| D2          | ATATTCTCGGAGACCCAGA       | GGAAGGTTATGAGGGCTAG       | 49                  | 743            | 901          | 177         |
| E           | GCTCCCTACTTGCCCTATG       | AGAATATGGAGGCTCCGTTT      | 50                  | 101            | 252          | 171         |
| F           | GGAGCCTCATATTCTTCATC      | AAGGATATTTGTCCTCATGGG     | 50                  | 256            | 399          | 164         |
| G           | CTATCAGCAATCCCCTACATC     | GTTAGAGCCTGTTTCGTGAAG     | 51                  | 448            | 598          | 171         |
| H           | GGCTCTAAACAACCCATCAGGC    | TAAAGTGGGTTTGCAGGGGTGT    | 51                  | 610            | 767          | 178         |
| I           | TAAACTCCGACGCAGAC         | TGTGGTGGAGTATTAAGTGG      | 50                  | 632            | 781          | 169         |

Product start and end positions represent the base pair position of the 3' end of the forward and reverse primers respectively, within the mtDNA cytochrome *b* gene.

**Table S2. Details of the samples of *Dicrostonyx* that successfully yielded the targeted 780 base pair region of mtDNA (cytochrome *b*) and modern *Dicrostonyx* sequence data obtained from GenBank**

| UI              | Accession no. | Country        | Site name | Stratigraphic position |              |      |
|-----------------|---------------|----------------|-----------|------------------------|--------------|------|
|                 |               |                |           | Layer/horizon          | Square/level | Spit |
| 01 <sub>a</sub> | JX867564      | United Kingdom | BPC       |                        |              |      |
| 02 <sub>a</sub> | JX867565      | United Kingdom | BPC       |                        |              |      |
| 03 <sub>a</sub> | JX867566      | United Kingdom | BPC       |                        |              |      |
| 03 <sub>b</sub> |               | United Kingdom | BPC       |                        |              |      |
| 03 <sub>c</sub> |               | United Kingdom | BPC       |                        |              |      |
| 04 <sub>a</sub> | JX867567      | Belgium        | TAW       | 12                     | M4D          | 6    |
| 05 <sub>a</sub> | JX867568      | Belgium        | TAW       | 12                     | M3           | 1    |
| 06 <sub>a</sub> | JX867569      | Belgium        | TAW       | 12                     | M3           | 1    |
| 06 <sub>b</sub> |               | Belgium        | TAW       | 12                     | M3           | 1    |
| 06 <sub>c</sub> |               | Belgium        | TAW       | 12                     | M3           | 1    |
| 06 <sub>d</sub> |               | Belgium        | TAW       | 12                     | M3           | 1    |
| 06 <sub>e</sub> |               | Belgium        | TAW       | 12                     | M3           | 1    |
| 06 <sub>f</sub> |               | Belgium        | TAW       | 12                     | M3           | 2    |
| 06 <sub>g</sub> |               | Belgium        | TAW       | 12                     | M3           | 2    |
| 06 <sub>h</sub> |               | Belgium        | TAW       | 12                     | M4           | 5    |
| 06 <sub>i</sub> |               | Belgium        | TAW       | 12                     | M4           | 5    |
| 06 <sub>j</sub> |               | Belgium        | CMJ       | 2                      |              |      |
| 07 <sub>a</sub> | JX867570      | Belgium        | TAW       | 12                     | M3           | 1    |
| 08 <sub>a</sub> | JX867571      | Belgium        | TAW       | 12                     | M3           | 2    |
| 09 <sub>a</sub> | JX867572      | Belgium        | TAW       | 12                     | M4           | 5    |
| 09 <sub>b</sub> |               | Belgium        | TAW       | 12                     | M4D          | 6    |
| 10 <sub>a</sub> | JX867573      | Belgium        | TAW       | 12                     | M4           | 5    |
| 10 <sub>b</sub> |               | Belgium        | TAW       | 12                     | M4           | 5    |
| 10 <sub>c</sub> |               | Belgium        | TAW       | 12                     | M4           | 5    |
| 10 <sub>d</sub> |               | Belgium        | TAW       | 12                     | M4           | 5    |
| 10 <sub>e</sub> |               | Belgium        | TAW       | 12                     | M4           | 5    |
| 10 <sub>f</sub> |               | Belgium        | TAW       | 12                     | M4D          | 6    |
| 10 <sub>g</sub> |               | Belgium        | TAW       | 12                     | M4D          | 6    |
| 10 <sub>h</sub> |               | Belgium        | TAW       | 12                     | M4D          | 6    |
| 10 <sub>i</sub> |               | Belgium        | TAW       | 12                     | M4D          | 6    |
| 10 <sub>j</sub> |               | Belgium        | TAW       | 12                     | M4D          | 6    |
| 10 <sub>k</sub> |               | Belgium        | TAW       | 12                     | M3           | 9    |
| 10 <sub>l</sub> |               | Belgium        | TAW       | 4                      | K4           | 5B   |
| 10 <sub>m</sub> |               | Belgium        | TAW       | 4                      | K4           | 5A   |
| 11 <sub>a</sub> | JX867574      | Belgium        | TAW       | 12                     | M4           | 5    |
| 11 <sub>b</sub> |               | Belgium        | TAW       | 12                     | M4D          | 6    |
| 12 <sub>a</sub> | JX867575      | Belgium        | TAW       | 12                     | M4           | 5    |
| 13 <sub>a</sub> | JX867576      | Belgium        | TAW       | 12                     | M4D          | 6    |
| 14 <sub>a</sub> | JX867577      | Belgium        | TAW       | 12                     | M4D          | 6    |

Table S2. Cont.

| UI              | Accession no. | Country | Site name | Stratigraphic position |              |      |
|-----------------|---------------|---------|-----------|------------------------|--------------|------|
|                 |               |         |           | Layer/horizon          | Square/level | Spit |
| 15 <sub>a</sub> | JX867578      | Belgium | TAW       | 12                     | M4           | 5    |
| 16 <sub>a</sub> | JX867579      | Belgium | TAW       | 12                     | M4           | 5    |
| 17 <sub>a</sub> | JX867580      | Belgium | TAW       | 12                     | M4D          | 6    |
| 18 <sub>a</sub> | JX867581      | Belgium | TAW       | 12                     | M4D          | 6    |
| 19 <sub>a</sub> | JX867582      | Belgium | TAW       | 12                     | M3           | 9    |
| 20 <sub>a</sub> | JX867583      | Belgium | CMJ       | 2                      |              |      |
| 21 <sub>a</sub> | JX867584      | Belgium | TAW       | 12                     | M3           | 9    |
| 22 <sub>a</sub> | JX867585      | Belgium | TAW       | 12                     | M3           | 9    |
| 23 <sub>a</sub> | JX867586      | Belgium | TAW       | 12                     | M4           | 6    |
| 24 <sub>a</sub> | JX867587      | Belgium | TAW       | 12                     | M4           | 6    |
| 24 <sub>b</sub> |               | Belgium | TAW       | 12                     | M3           | 9    |
| 25 <sub>a</sub> | JX867588      | Belgium | TAW       | 14                     | D7           | 16   |
| 26 <sub>a</sub> | JX867589      | Belgium | TAW       | 14                     | D7           | 16   |
| 27 <sub>a</sub> | JX867590      | Belgium | TAW       | 14                     | K6           | 9    |
| 28 <sub>a</sub> | JX867591      | Belgium | TAW       | 14                     | K6           | 9    |
| 29 <sub>a</sub> | JX867592      | Belgium | TAW       | 16                     | M7           | 16   |
| 30 <sub>a</sub> | JX867593      | Belgium | TAW       | 14                     | K7           | 9    |
| 31 <sub>a</sub> | JX867594      | Belgium | TAW       | 16                     | M7           | 16   |
| 32 <sub>a</sub> | JX867595      | Belgium | TAW       | 12                     | M4           | 6    |
| 33 <sub>a</sub> | JX867596      | Belgium | CMJ       | 3                      |              |      |
| 34 <sub>a</sub> | JX867597      | Belgium | CMJ       | 5                      | A&B          |      |
| 35 <sub>a</sub> | JX867598      | Belgium | CMJ       | 5                      | A            |      |
| 36 <sub>a</sub> | JX867599      | Belgium | CMJ       | 5                      | A            |      |
| 37 <sub>a</sub> | JX867600      | Belgium | CMJ       | 3                      |              |      |
| 38 <sub>a</sub> | JX867601      | Belgium | TAW       | 16                     | C7           | 19   |
| 39 <sub>a</sub> | JX867602      | Belgium | CMJ       | 4                      |              |      |
| 40 <sub>a</sub> | JX867603      | Belgium | CMJ       | 5                      | B            |      |
| 41 <sub>a</sub> | JX867604      | Belgium | CMJ       | 4                      |              |      |
| 42 <sub>a</sub> | JX867605      | Belgium | CMJ       | 5                      | B            |      |
| 43 <sub>a</sub> | JX867606      | Belgium | CMJ       | 5                      | B            |      |
| 44 <sub>a</sub> | JX867607      | Belgium | CMJ       | 5                      | A            |      |
| 45 <sub>a</sub> | JX867608      | Belgium | CMJ       | 5                      | A            |      |
| 46 <sub>a</sub> | JX867609      | Belgium | CMJ       | 6                      |              |      |
| 47 <sub>a</sub> | JX867610      | Belgium | CMJ       | 6                      |              |      |
| 48 <sub>a</sub> | JX867611      | Belgium | CMJ       | 6                      |              |      |
| 49 <sub>a</sub> | JX867612      | Belgium | CMJ       | 6                      |              |      |
| 50 <sub>a</sub> | JX867613      | Belgium | CMJ       | 4                      |              |      |
| M01             | AJ238423      | Russia  |           |                        |              |      |
| M02             | AJ131441      | Russia  |           |                        |              |      |
| M03             | AJ238425      | Russia  |           |                        |              |      |
| M04             | AJ238424      | Russia  |           |                        |              |      |
| M05             | AJ131442      | Russia  |           |                        |              |      |
| M06             | AF119275      | Russia  |           |                        |              |      |
| M07             | AJ238421      | Russia  |           |                        |              |      |
| M08             | AJ131439      | Russia  |           |                        |              |      |
| M09             | AJ131440      | Russia  |           |                        |              |      |
| M10             | AJ238422      | Russia  |           |                        |              |      |
| O               | AJ238437      | Canada  |           |                        |              |      |

UI M, modern; UI O, modern (used as an outgroup).

**Table S3. Radiocarbon dates from samples of *Dicrostonyx* used in our analyses**

| UI              | Site | AMS 14C Date<br>(yr BP) | ±     | Calibrated age range<br>BP (95.4%) | Median<br>yr BP | Reference no, | Lineage |
|-----------------|------|-------------------------|-------|------------------------------------|-----------------|---------------|---------|
| 06 <sub>j</sub> | CMJ  | 12,275                  | 55    | 14,850–13,925                      | 14,165          | OxA-24122     | 5       |
| 06 <sub>g</sub> | TAW  | 14,415                  | 70    | 17,865–17,185                      | 17,539          | OxA-2354-15   | 5       |
| 07 <sub>a</sub> | TAW  | 15,150                  | 120   | 18,641–18,021                      | 18,287          | OxA-2352-39   | 5       |
| 06 <sub>f</sub> | TAW  | 16,440                  | 100   | 19,903–19,403                      | 19,562          | OxA-23565     | 5       |
| 08 <sub>a</sub> | TAW  | 16,980                  | 110   | 20,443–19,609                      | 20,166          | OxA-2352-41   | 5       |
| 06 <sub>h</sub> | TAW  | 17,030                  | 90    | 20,467–19,876                      | 20,227          | OxA-2354-14   | 5       |
| 11 <sub>a</sub> | TAW  | 17,520                  | 120   | 21,329–20,422                      | 20,859          | OxA-23564     | 4       |
| 10 <sub>a</sub> | TAW  | 17,780                  | 130   | 21,535–20,548                      | 21,230          | OxA-2352-40   | 4       |
| 10 <sub>c</sub> | TAW  | 17,780                  | 120   | 21,533–20,553                      | 21,238          | OxA-23563     | 4       |
| 19 <sub>a</sub> | TAW  | 18,260                  | 120   | 22,217–21,452                      | 21,815          | OxA-23567     | 4       |
| 20 <sub>a</sub> | CMJ  | 20,930                  | 140   | 25,456–24,497                      | 24,945          | OxA-24123     | 3       |
| 24 <sub>a</sub> | TAW  | 22,500                  | 190   | 27,894–26,327                      | 27,237          | OxA-2354-16   | 3       |
| 26 <sub>a</sub> | TAW  | 25,650                  | 450   | 31,101–29,584                      | 30,449          | OxA-2352-11   | 3       |
| 23 <sub>a</sub> | TAW  | 26,300                  | 380   | 31,351–30,356                      | 30,917          | OxA-2352-42   | 3       |
| 32 <sub>a</sub> | TAW  | 26,830                  | 360   | 31,805–30,735                      | 31,249          | OxA-23566     | 3       |
| 35 <sub>a</sub> | CMJ  | 40,500                  | 1,400 | <b>47,501–42,364</b>               | <b>44,513</b>   | OxA-24119     | 2       |
| 34 <sub>a</sub> | CMJ  | > 43,700                |       |                                    |                 | OxA-24121     | 2       |
| 39 <sub>a</sub> | CMJ  | 47,600                  | 3,300 | <b>63,308–42,622</b>               | <b>49,601</b>   | OxA-24115     | 1       |
| 41 <sub>a</sub> | CMJ  | 43,000                  | 1,900 | <b>49,972–44,453</b>               | <b>46,752</b>   | OxA-24117     | 1       |
| 40 <sub>a</sub> | CMJ  | 43,600                  | 2,100 | <b>NA–44,756</b>                   | <b>47,165</b>   | OxA-24118     | 1       |
| 42 <sub>a</sub> | CMJ  | 44,400                  | 2,300 | <b>NA–45,131</b>                   | <b>47,571</b>   | OxA-24120     | 1       |
| 46 <sub>a</sub> | CMJ  | > 43,000                |       |                                    |                 | OxA-24124     | 1       |
| 50 <sub>a</sub> | CMJ  | > 43,900                |       |                                    |                 | OxA-24116     | 1       |
| 45 <sub>s</sub> | TAW  | Failed no yield         |       |                                    |                 |               |         |
| 28 <sub>a</sub> | TAW  | Failed no yield         |       |                                    |                 |               |         |
| 25 <sub>a</sub> | TAW  | Failed low yield        |       |                                    |                 |               |         |
| 38 <sub>a</sub> | TAW  | Failed no yield         |       |                                    |                 |               |         |
| 31 <sub>a</sub> | TAW  | Failed low yield        |       |                                    |                 |               |         |

Dates were calibrated using Oxcal v4.1 with the IntCal09 calibration curve. Dates in bold may extend the calibration range. NA, not available because of likely extension beyond the calibration range.

**Table S4. Haplotype frequency (per age range years BP) of Pymva-Shor samples**

| PS H<br>number | Accession no. | Haplotype frequency |                |                |                |
|----------------|---------------|---------------------|----------------|----------------|----------------|
|                |               | Modern              | 11,500 (yr BP) | 15,200 (yr BP) | 25,200 (yr BP) |
| 01             | HM009006      |                     |                | 2              | 2              |
| 02             | HM008998      | 7                   | 14             | 1              | 3              |
| 03             | HM008999      | 3                   |                |                |                |
| 04             | HM009000      |                     | 2              | 7              | 1              |
| 05             | HM009001      |                     | 1              |                |                |
| 06             | HM009002      |                     | 1              |                |                |
| 07             | HM009003      |                     | 1              |                |                |
| 08             | HM009004      |                     | 1              |                |                |
| 09             | HM009005      |                     | 1              |                |                |
| 10             | HM009008      |                     |                | 8              | 2              |
| 11             | HM009007      |                     |                | 1              | 3              |
| 12             | HM009009      |                     |                |                | 2              |
| 13             | HM009010      |                     |                |                | 1              |

**Table S5. Bayesian derived timing of lineage presence (1–5) and turnover events (A–D) between lineages of *Dicrostonyx* from North-West Europe based on AMS dated samples**

| Lineage | Turnover event | Upper boundary (95.4%) | Lower boundary (95.4%) | Range for turnover events |
|---------|----------------|------------------------|------------------------|---------------------------|
| 1       |                | 50,766–46,002          | 49,168–44,733          |                           |
|         | A              | 49,168–44,733          | 47,624–42,990          | 48,386–43,817             |
| 2       |                | 47,624–42,990          | 45,613–33,777          |                           |
|         | B              | 45,613–33,777          | 37,577–30,931          | 42,938–31,631             |
| 3       |                | 37,577–30,931          | 25,243–22,043          |                           |
|         | C              | 25,243–22,043          | 22,894–21,300          | 24,479–21,564             |
| 4       |                | 22,894–21,300          | 21,344–20,423          |                           |
|         | D              | 21,344–20,423          | 21,062–20,114          | 21,200–20,269             |
| 5       |                | 21,062–20,114          | 14,907–11,396          |                           |

Dates are calibrated calendar ages (years BP) generated using Oxcal v4.1 with the IntCal09 calibration curve.
